# Supplementary material
Source: MDPI journal article supplement (https://www.mdpi.com/2075-5309/12/7/937)
Supplement: s1 [file s1]

**Table S1 Chongqing new infrastructure classification and subordinate department code table**

| New Infra-structure Category     | New Infrastructure Project of Chongqing                                                          | Code | Management Department                                    | Code |
|----------------------------------|--------------------------------------------------------------------------------------------------|------|----------------------------------------------------------|------|
| Information Infrastructure A     | China Mobile Edge Computing Platform                                                             | A1   | Municipal Big Data Development Bureau                    | M1   |
|                                  | Banan Tenglong 5G Park                                                                           | A2   | Banan District Government                                | M2   |
|                                  | Chongqing Tencent Cloud Computing Data Center Phase II                                           | A3   | Liangjiang New Area Administrative Committee             | M3   |
|                                  | China Mobile Data Center Phase I                                                                 | A4   | Nan'an District Government                               | M4   |
|                                  | 5g Construction                                                                                  | A5   | Municipal Communications Administration                  | M5   |
|                                  | Universal Data Chongqing Data Center                                                             | A6   | Liangjiang New Area Administrative Committee             | M3   |
|                                  | Sino-Singapore International Supercomputing Center Project                                       | A7   | Municipal Big Data Development Bureau                    | M1   |
| Convergence Infrastructure B     | Chongqing Cable Smart Broadcasting Data Center Phase I                                           | B8   | Municipal Culture and Tourism Commission                 | M6   |
|                                  | Jiulongpo Runze Smart Industry Innovation City Phase I                                           | B9   | Jiulongpo District Government                            | M7   |
|                                  | Smart Guangyang Island                                                                           | B10  | Guangyang Island Construction Leadership Office          | M8   |
|                                  | Rongchang National Pig Data Cente                                                                | B11  | Rongchang District Government                            | M9   |
|                                  | Wanzhou Tencent Cloud Digital Economy Talent Innovation Center                                   | B12  | Wanzhou District Government                              | M10  |
|                                  | Nanan Data Lake Industrial Park                                                                  | B13  | Nanan District Government                                | M4   |
|                                  | Yongchuan Smart Transportation Pilot                                                             | B14  | Yongchuan District Government                            | M11  |
|                                  | Yongchuan Smart Medical Pilot                                                                    | B15  | Yongchuan District Government                            | M11  |
|                                  | Digital Chongqing High-tech Zone Construction                                                    | B16  | Chongqing High-tech Zone Administrative Committee        | M12  |
|                                  | Chongqing "two rivers and four banks" core area IOT integration construction                     | B17  | Municipal Housing and Urban-Rural Development Commission | M13  |
|                                  | Banan Zongshen Kumi Industrial Internet                                                          | B18  | Banan District Government                                | M2   |
|                                  | Gaozhu New District Dual Innovation Center                                                       | B19  | Yubei District Government                                | M14  |
|                                  | Agricultural Science and Technology Innovation Platform                                          | B20  | Municipal Agriculture and Rural Committee                | M15  |
| Innovation in-<br>frastructure C | Chongqing aerospace remote sensing image coordination and Beidou positioning service application | C21  | Municipal Bureau of Planning and Natural Resources       | M16  |
|                                  | Wireless Energy Transmission and Environmental Impact Science Project                            | C22  | Municipal Science and Technology Bureau                  | M17  |
|                                  | Chongqing International Institute of Immunology                                                  | C23  | Banan District Government                                | M2   |
|                                  | Upstream of Yangtze River Germplasm Creation Science Center                                      | C24  | Municipal Science and Technology Bureau                  | M17  |
|                                  | Chongqing Science Center of Chinese Academy of Sciences                                          | C25  | Municipal Science and Technology Bureau                  | M17  |
|                                  | Chongqing Center for Natural Population Biological Resources of China                            | C26  | Municipal Science and Technology Bureau                  | M17  |
|                                  | Shapingba Qingfeng High-tech Innovation Incubation Center                                        | C27  | Shapingba District Government                            | M18  |

## S2 ERGM model specific construction process

Model 1 is a null model, containing only the edge ( $E_D$ ) statistical term in the network, i.e., the number of all new infrastructure subjects associated in the new infrastructure association network in Chongqing, which will be used as a control variable to be referenced in the subsequent model construction. The model equation for the edge is:

$$P(Y = y|X) = \frac{\exp(\theta_1 E_D)}{k}$$

Model 2 adds individual attribute variables (betweenness centrality  $N_B$ , node centrality  $N_D$ ) and node homogeneity variables (organizational homogeneity  $N_O$ , geographic homogeneity  $N_L$ ) to model 1 to consider the influence of the nodes' individual attribute features and node feature interaction terms on the overall association network, and how the connected edges with the same attribute nodes affect the overall new infrastructure association network construction. The corresponding ERGM model equation is:

$$P(Y = y|X) = \frac{\exp(\theta_1 E_D + \theta_2 N_B + \theta_3 N_D + \theta_4 N_O + \theta_5 N_L)}{k}$$

Model 3 adds reciprocity ( $M_U$ ), 2-path ( $T_W$ ) and geometrically weighted edge-wise shared partners ( $G_E$ ) to model 1 as indicators to examine the impact of reciprocity structures and closed triangles formed among new infrastructures on the overall association formation. The corresponding ERGM model equation is:

$$P(Y = y|X) = \frac{\exp(\theta_1 E_D + \theta_6 M_U + \theta_7 T_W + \theta_8 G_E)}{k}$$

Model 4 is an integrated model, which incorporates network structure variables, individual attribute variables and homogeneity variables into the same statistical model to analyze the influence of different variables on the formation of network relationships in an integrated manner; simultaneously comparing the goodness-of-fit of the integrated model with other models to determine whether the integrated model is better at portraying the true characteristics of the new infrastructure association network. The ERGM integrated model equation is:

$$P(Y = y|X) = \frac{\exp(\theta_1 E_D + \theta_2 N_B + \theta_3 N_D + \theta_4 N_O + \theta_5 N_L + \theta_6 M_U + \theta_7 T_W + \theta_8 G_E)}{k}$$
